# Supplementary material for: Rho and riboswitch-dependent regulations of mntP gene expression evade manganese and membrane toxicities
Source: PubMed Central journal article supplement (PMC11647493; doi:10.1016/j.jbc.2024.107967), 2024-11-05
Supplement: mmc1.pdf [file mmc1.pdf]

## Supporting Information

### Rho and riboswitch-dependent regulations of *mntP* expression evade manganese and membrane toxicities

Anand Prakash<sup>1, ‡</sup>, Arunima Kalita<sup>1, ‡</sup>, Kanika Bhardwaj<sup>1, ‡</sup>, Rajesh Kumar Mishra<sup>1</sup>, Debarghya Ghose<sup>1</sup>, Gursharan Kaur<sup>1</sup>, Neha Verma<sup>1, 2</sup>, Bibhusita Pani<sup>3</sup>, Evgeny Nudler<sup>3,4</sup> and Dipak Dutta<sup>1, 2, \*</sup>

<sup>1</sup>Department of Molecular Biochemistry and Microbiology, CSIR Institute of Microbial Technology, Sector 39-A, Chandigarh 160036, India

<sup>2</sup>Academy of Scientific and Innovative Research (AcSIR), Ghaziabad, Uttar Pradesh 201002

<sup>3</sup>Department of Biochemistry and Molecular Pharmacology, New York University Grossman School of Medicine, New York, NY 10016, USA

<sup>4</sup>Howard Hughes Medical Institute, NYU Langone Health, New York, NY 10016, USA.

‡Equal contributions

\* Correspondence: [dutta@imtech.res.in](mailto:dutta@imtech.res.in)

**Present addresses for:** Arunima Kalita, Department of Bacteriology, University of Wisconsin-Madison, 1550 Linden Drive Madison, Wisconsin 53706; Rajesh Kumar Mishra, Department of Biological Sciences, Indian Institute of Science Education and Research Mohali, Knowledge City, Sector 81, SAS Nagar 140306, India; Debarghya Ghose, Biotech Desk Pvt. Ltd, 3-5-22/2/A Krishnanagar, Secunderabad 500062, India.

**Running title:** Rho suppresses *mntP* expression

#### List of Materials

1. Supporting information Text
2. Figure S1, S2, S3 and S4
3. Table S1

## Supporting information text

### Construction of *E. coli* strains containing *mntP*-FLAG genotype

To generate *E. coli* strains with *mntP*-FLAG in the chromosome, we designed a synthetic DNA fragment containing homology 1 and homology 2 sites at the 3'- end of the *mntP* ORF from BiotechDesk, India. The homology-1 site, the 113-nucleotide long sequence from the 3'-end coding sequence of the *mntP* gene, was followed by a FLAG epitope coding sequence, Kan<sup>R</sup> cassette of pKD4 vector, and homology-2 site. The synthetic DNA fragment was transformed in the WT and  $\Delta$ RS strains and screened for kanamycin resistance. Finally, the Kan<sup>R</sup> was removed by the FLP-recombinase system, as described (43). The Figure S4 shows the different sequence elements of *mntP*-FLAG synthetic DNA

## Supplementary Figures

**Figure S1.**

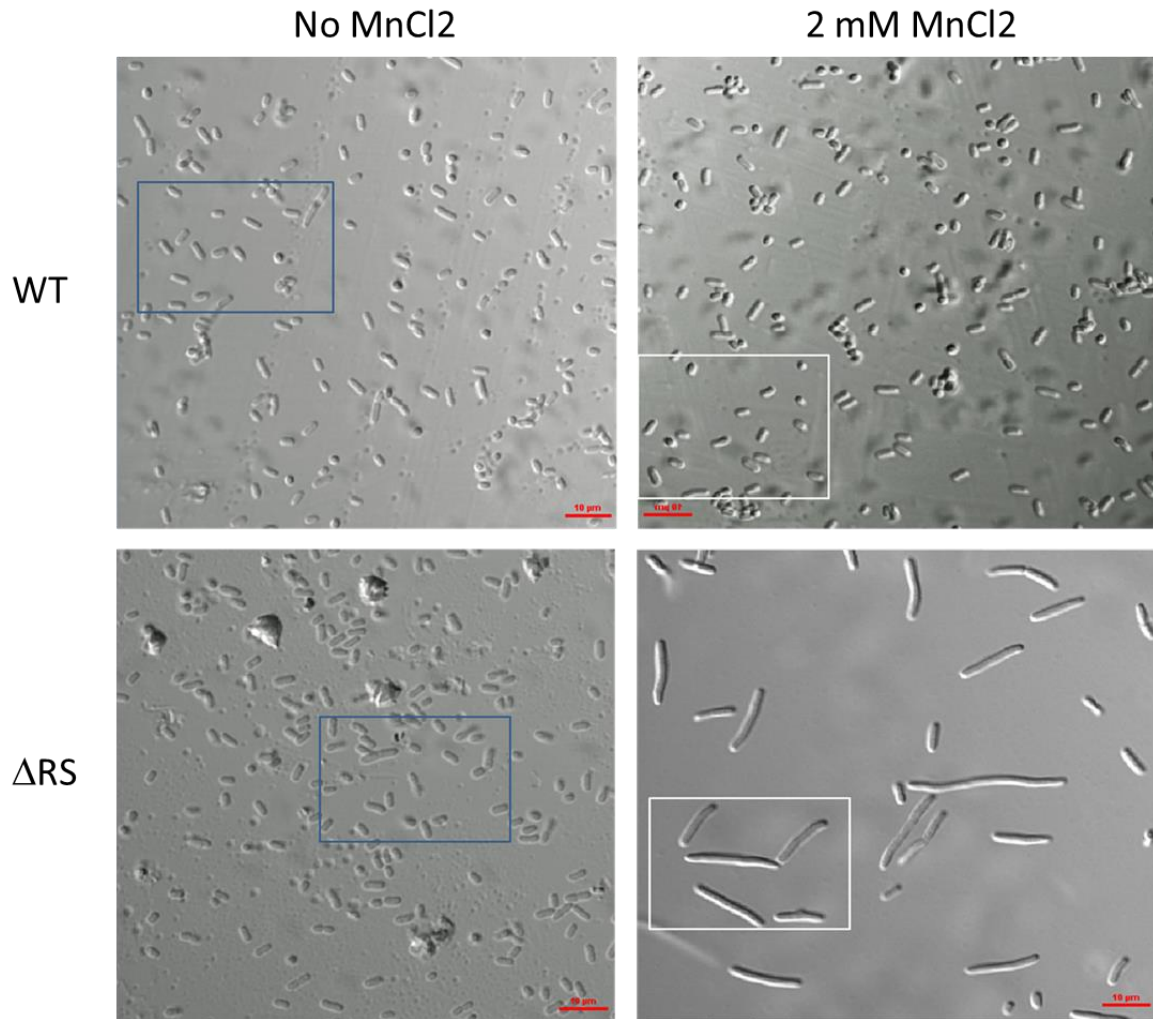

**Figure S1.** The cell morphologies judged under a confocal microscope when the WT and  $\Delta$ RS strains were treated with Mn. The rectangular boxes in the panels are presented in Figure 4C.

**Figure S2.**

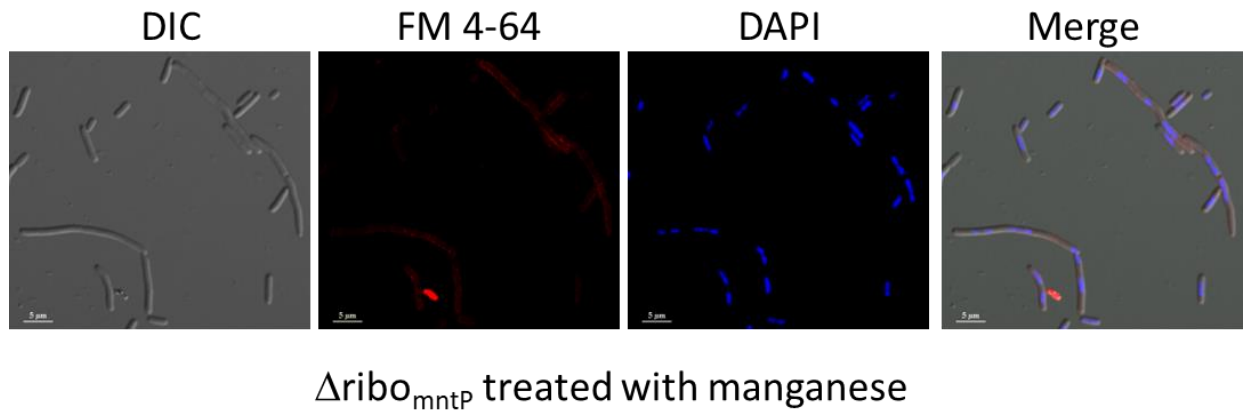

**Figure S2.** Mn-treated  $\Delta RS$  cells were stained with FM-4-64 and DAPI to show that the filamentous cells had no septum, and discrete chromosomal DNA units were arranged throughout the filamented cells.

**Figure S3.**

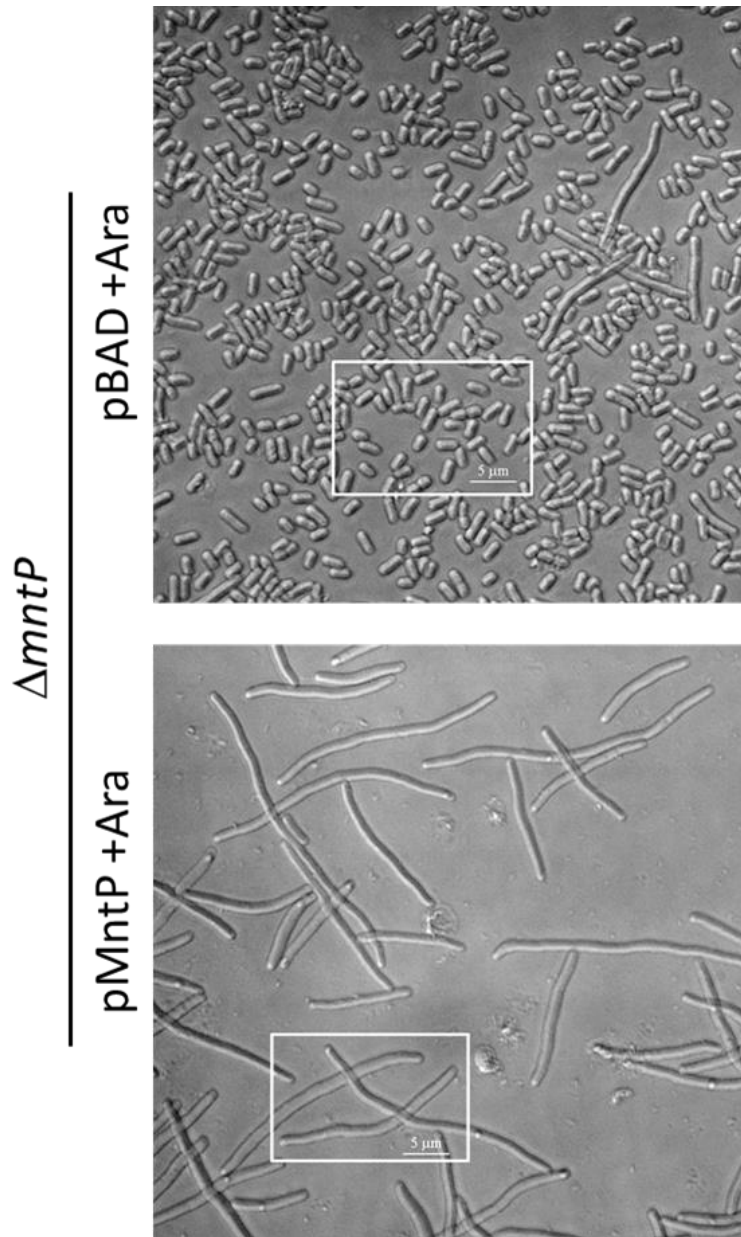

**Figure S3.** The cell morphologies judged under a confocal microscope with or without MntP overexpression. The rectangular boxes in the panels are presented in Figure 6B.

**Figure S4.**

**A.**

```

BGATGATGGTTGGTCGCTTTATCGGCTCAAT TATTGGGAAAAAAGCGGAAATTCTCGGCGGGCTGGTGTGATCGGCATCGGCGTC
CAGATCCTCTGGACGCACTTCCACGGTACTACTGCTAGCGAGAATTTGTATTTTCAGGGTGAGCTCGACTACAAAGACCATGACGG
TGATTATAAAGATCATGACATCGACTACAAGGATGACGATGACAAGTAGGTGTAGGCTGGAGCTGCTTCGAAGTTCCTATACTTTC
TAGAGAATAGGAACTTCGGAATAGGAACTTCAAGATCCCCCTCACGCTGCCGCAAGCACTCAGGGCGCAAGGGCTGCTAAAGGAAGC
GGAACACGTAGAAAAGCCAGTCCGCAGAAACGGTGTGACCCCGGATGAATGTCAGCTACTGGGCTATCTGGACAAGGAAAAACGCA
AGCGCAAAGAGAAAGCAGGTAGCTTGCAGTGGGCTTACATGGCGATAGCTAGACTGGGCGGTTTTATGGACAGCAAGCGAACCGGA
ATTGCCAGCTGGGGCGCCCTCTGGTAAGGTTGGGAAGCCCTGCAAAGTAAACTGGATGGCTTCTTGCCGCCAAGGATCTGATGGC
GCAGGGGATCAAGATCTGATCAAGAGACAGGATGAGGATCGTTTCGCATGATTGAACAAGATGGATTGCACGCAGGTTCTCCGGCC
GCTTGGGTGGAGAGGCTATTCCGCTATGACTGGGCACAACAGACAATCGGCTGCTCTGATGCCGCCGTGTTCCGGCTGTGACGCGCA
GGGGCGCCCGGTTCTTTTGTCAAGACCGACCTGTCCGGTGCCTGAATGAACTGCAGGACGAGGCAGCGCGGCTATCGTGGCTGG
CCACGACGGGCGTTCCTTGCCGAGCTGTGCTCGACGTTGTCACTGAAGCGGGAAGGGACTGGCTGCTATTGGGCGAAGTGCCGGGG
CAGGATCTCCTGTGATCTACCTTGTCTCTGCCGAGAAAGTATCCATCATGGCTGATGCAATGCCGGCGGCTGCATACGCTTGATCC
GGCTACCTGCCCATTCGACCACCAAGCGAAAACATCGCATCGAGCGAGCACGTA CTGGATGGAAGCCGGTCTTGTGATCAGGATG
ATCTGGACGAAGAGCATCAGGGGCTCGCGCCAGCCGAACTGTTCCGCCAGGCTCAAGGCGCGCATGCCCGACGCGGAGGATCTCGTC
GTGACCCATGGCGATGCCGTGCTTGCCGAATATCATGGTGGAAAATGGCCGCTTTTCTGGATTGATCGACTGTGGCCGGCTGGGTGT
GGCGGACCGCTATCAGGACATAGCGTTGGCTACCCGTGATATTGCTGAAGAGCTTGGCGGCGAATGGGCTGACCGCTTCCCTGTGC
TTTACGGTATCGCCGCTCCCGATTGCGAGCGCATCGCCTTCTATCGCCTTCTTGACGAGTTCCTTGAGCGGGACTCTGGGGTTCCG
AAATGACCGACCAAGCGACGCCAACCTGCCATCAGGATTTGATTCACC GCCGCTTCTATGAAAGGTTGGGCTTCGGAATC
GTTTTCCGGGACCGCGCTGGATGATCCTCCAGCGCGGGGATCTCATGCTGGAGTTCCTCGCCACCCAGCTTCAAAGCGCTCT
GAAGTTCCTATACTTCTAGAGAATAGGAACTTCGGAATAGGAACTAAGGAGGATATTCATATT TTTTGCTGCCAGTGTTGCCAG
ACTTCTGGCTTCGCACGCCAGGCAAACGGCGTCATCTGCAATAATGCGACGGCTTCATCACC GCGAAGAC

```

**B.**

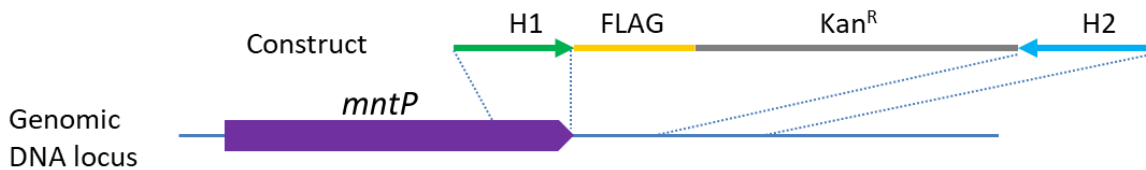

**Figure S4. A.** The synthetic DNA sequence showing green highlighted Homology 1 site taken from the 3'-end of *mntP* ORF, yellow highlighted FLAG epitope-containing coding sequence, grey highlighted Kan<sup>R</sup> cassette flanked by FRT sites from pKD4 vector, cyan highlighted Homology 2 site taken from the noncoding DNA downstream of the *mntP* ORF. **B.** The schematic indicates the synthetic DNA construct and its different parts. The integration sites of the synthetic DNA in the genomic DNA are marked.

**Table S1.** List of oligonucleotides used in this study

| Oligonucleotides | Sequence                                                                         | Description                                                                                |
|------------------|----------------------------------------------------------------------------------|--------------------------------------------------------------------------------------------|
| T7A1_F           | CACTGAGGTACCTCCAGATCCCG<br>AAAATTTATCAA                                          | T7A1 promoter Forward primer With <i>KpnI</i> site.                                        |
| DD6              | GAACTCCAGCGGTTGCTCCCTCT<br>CGA                                                   | T7A1 promoter Reverse primer                                                               |
| AK 1 mntP_T7A1   | AGCAACCGCTGGAGTTCGCCCTC<br>ATTTGGGGAGTAG                                         | <i>mntP</i> riboswitch Forward primer with T7A1-reverse primer overhang.                   |
| D175             | AGCAACCGCTGGAGTTCGCCGA<br>TTTCCAGATTCCG                                          | <i>mntP</i> riboswitch Forward primer with T7A1-reverse primer overhang                    |
| mn70rev          | GTCAGTGAATTCTTAGTGGTT<br>CCATTCAAGGAC                                            | Reverse primer with <i>EcoRI</i> restriction site                                          |
| RiboS1           | TATATTCTCAAATATGTTAA<br>GGTTGCGCCCTCATTTGGGGA<br>GTAGCCGTGTAGGCTGGAGCT<br>GCTTCG | Forward primer for <i>mntP</i> riboswitch deletion                                         |
| RiboS3           | CATCCATCGACATACCAAACG<br>CAAGAAGAACAGTAGCAGTG<br>ATATTCATATGAATATCCTCC<br>TTAG   | Reverse primer for <i>mntP</i> riboswitch deletion.                                        |
| D174             | GCTTAGGCTATATTACCTC                                                              | Forward primer to check riboswitch deletion by PCR and sequencing                          |
| <i>mntPF</i>     | ATCACGGCTTGTTGTTTCATG                                                            | Forward primer for checking <i>mntP</i> ORF integrity by sequencing                        |
| <i>mntPR</i>     | CAGAAGTCTGGCAAACACTG                                                             | Reverse primer for checking <i>mntP</i> ORF integrity by sequencing                        |
| T7A1P            | TCCAGATCCCGAAAATTTATC<br>AA                                                      | T7A1 promoter forward PCR primer for in vitro transcription template T1 and T2 preparation |

|           |                                         |                                                                               |
|-----------|-----------------------------------------|-------------------------------------------------------------------------------|
| DD144     | CAGGGTTTCGACGGCAGCAA<br>AAATAAGGCCGGTTC | Reverse PCR primer for in vitro transcription template T1 preparation         |
| D176      | CATGACAATGTCCTGACC                      | Reverse PCR primer for in vitro transcription template T2 preparation         |
| GK1       | AATATCACTGCTACTG                        | <i>mntP</i> ORF forward primer to clone in pBAD vector                        |
| GK2       | ACAAGTAAGCTTTAACCGTGG<br>AAGTGCGTC      | <i>mntP</i> ORF reverse primer with stop codon to clone in pBAD vector        |
| DD149     | GATTGCCACCAGCCTGGCTGC<br>CATGGCTGTGG    | SDM primer 1 to generate pMntP <sup>D118A</sup> vector from pBAD- <i>mntP</i> |
| DD150     | CCACAGCCATGGCAGCCAGG<br>CTGGTGGCAATC    | SDM primer 2 to generate pMntP <sup>D118A</sup> vector from pBAD- <i>mntP</i> |
| KK2       | AGCAACCGCTGGAGTTCGTCG<br>AACGTCAACTTAC  | <i>trp t'</i> forward primer with DD6 overhangs                               |
| KK3       | GTATGGAATTCCTCCGTTGCGT<br>TGCATTGTTTC   | <i>trp t'</i> reverse primer with <i>EcoRI</i> site                           |
| mntPF-RT: | CGTCGACACGGTTTCTG                       | <i>mntP</i> forward primer for qPCR                                           |
| mntPR-RT: | AGCGACCAACCATCATCCCT                    | <i>mntP</i> reverse primer for qPCR                                           |
| betBF     | AACTTCTTCAGCTCCGGTCA                    | <i>betB</i> forward primer for qPCR                                           |
| betBR     | GCCGAAGTTAGTTTGCGGAT                    | <i>betB</i> reverse primer for qPCR                                           |
